# Supplementary material for: Mitochondria-targeted ubiquinone (MitoQ) enhances acetaldehyde clearance by reversing alcohol-induced posttranslational modification of aldehyde dehydrogenase 2: A molecular mechanism of protection against alcoholic liver disease
Source: PubMed Central journal article supplement — Redox Biol. 2017 Nov 11;14:626–36. doi: 10.1016/j.redox.2017.11.005 (PMC5700831; doi:10.1016/j.redox.2017.11.005), 2017-11-11
Supplement: mmc1.pdf [file mmc1.pdf]

Mitochondria-targeted ubiquinone (MitoQ) enhances acetaldehyde clearance by reversing alcohol-induced posttranslational modification of aldehyde dehydrogenase 2: A molecular mechanism of protection against alcoholic liver disease

Liuyi Hao<sup>1</sup>, Qian Sun<sup>1</sup>, Wei Zhong<sup>1</sup>, Wenliang Zhang<sup>1</sup>, Xinguo Sun<sup>1</sup>, Zhanxiang Zhou<sup>1,2\*</sup>

Affiliations: <sup>1</sup> Center for Translational Biomedical Research and <sup>2</sup> Department of Nutrition, University of North Carolina at Greensboro, North Carolina Research Campus, Kannapolis, NC, USA 28081.

\* Corresponding author: Zhanxiang Zhou, Center for Translational Biomedical Research and Department of Nutrition, University of North Carolina at Greensboro, North Carolina Research Campus, 500 Laureate Way, Suite 4226, Kannapolis, NC 28081. Phone: 704-250-5800. Fax: 704-250-5809. E-mail: z\_zhou@uncg.edu.

## Supplementary Methods

### Biochemical analysis

The plasma ALT and AST activities were measured with an Infinity kits (Thermo Scientific, Waltham, MA). GSH and GSSG concentrations in the liver were determined by a commercial kit (BioVision, Milpitas, CA). The levels of triglycerides and free fatty acids in liver and plasma were measured with Triglyceride Assay kit (Thermo Scientific, Waltham, MA) and Free Fatty Acid Assay Kit (BioVision, Milpitas, CA), respectively, as described previously [1]. Aldehyde dehydrogenase (ALDH) activity was measured by a commercial Kit (BioVision, Milpitas, CA) followed by the manufacturer's instructions. Briefly, acetaldehyde was oxidized by ALDH in the homogenates of liver, ileum mucosa, or liver subcellular fractions. The generated nicotinamide adenine dinucleotide (NADH) then reduced a colorless probe to a colored product with strong absorbance at 450 nm. The ALDH activity was calculated as mmol NADH/min/mg protein. Serum H<sub>2</sub>O<sub>2</sub> levels were measured with an Amplex Red Hydrogen peroxide/Peroxidase Assay kit (Invitrogen, Waltham, MA) as described previously [2]. The endotoxin levels in plasma were assessed by a chromogenic kinetic limulus amoebocyte lysate assay kit (Lonza, Allendale, NJ) followed by the manufacturer's instructions. Liver contents of NAD<sup>+</sup> and NADH were determined by a commercial kit (BioVision, Milpitas, CA) as previously described [3]. Nitrite contents were measured by a Griess Reagent Kit (ACROS, NJ) followed by the manufacturer's instructions.

## Supplemental Figures

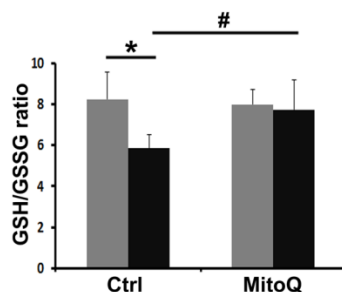

**Supplemental Fig. 1** MitoQ supplementation ameliorated chronic alcohol-decreased GSH/GSSG ratio. \* P < 0.05 vs PF, # P<0.05 vs.AF.

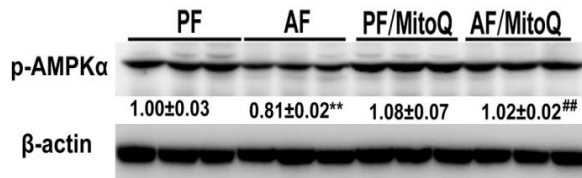

**Supplemental Fig. 2** MitoQ reversed alcohol-decreased hepatic p-AMPKα protein levels. \* P < 0.05 vs PF, # P<0.05 vs.AF. ## P<0.01 vs.AF. Proteins levels were quantitated by NIH image J. All values are denoted as means ± SD

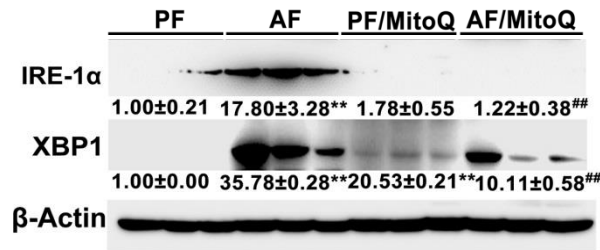

**Supplemental Fig. 3** MitoQ reversed alcohol-increased hepatic IRE-1α and XBP-1 protein levels. \* P < 0.05 vs PF, # P<0.05 vs.AF. ## P<0.01 vs.AF. Proteins levels were quantitated by NIH image J. All values are denoted as means ± SD

**Supplemental Table 1**

| Name      | Forward                      | Reverse                      |
|-----------|------------------------------|------------------------------|
| Mcp-1     | GGAAAAATGGATCCACACCTTGC      | TCTCTCCTCCACCACCATGCAG       |
| TNFα      | TACTGAACTTCGGGGTGATTGGTCC    | CAGCCTTGTCCTTGAAGAGAACC      |
| KC        | GCGAATTCACCATGATCCCAGCCACCCG | GCTCTAGATTACTTGGGGACACCTTTAG |
| Claudin-1 | GTTTGCAGAGACCCCATCAC         | AGAAGCCAGGATGAAACCCA         |
| Occludin  | CTCCCATCCGAGTTTCAGGT         | GCTGTGCCTAAGGAAAGAG          |
| 18s       | GTAACCCGTTGAACCCCAT          | CCATCCAATCGGTAGTAGCG         |

## Supplementary References

[1] W. Zhang, W. Zhong, Q. Sun, X. Sun, Z. Zhou, Hepatic overproduction of 13-HODE due to ALOX15 upregulation contributes to alcohol-induced liver injury in mice, *Scientific reports* 7(1) (2017) 8976.

[2] Q. Sun, W. Zhang, W. Zhong, X. Sun, Z. Zhou, Pharmacological inhibition of NOX4 ameliorates alcohol-induced liver injury in mice through improving oxidative stress and mitochondrial function, *Biochimica et biophysica acta* 1861(1 Pt A) (2017) 2912-2921.

[3] Q. Li, G. Xie, W. Zhang, W. Zhong, X. Sun, X. Tan, X. Sun, W. Jia, Z. Zhou, Dietary nicotinic acid supplementation ameliorates chronic alcohol-induced fatty liver in rats, *Alcoholism, clinical and experimental research* 38(7) (2014) 1982-92.
